# Supplementary material for: Remote Sensing Evidence for Significant Variations in the Global Gross Domestic Product during the COVID-19 Epidemic
Source: MDPI journal article supplement (doi:10.3390/su142215201), 2022-11-16
Supplement: s1 [file s1]

Archive with 1 entries (1 files):
- sustainability-1929330-supplementary.pdf
